# Supplementary material for: Identification of Neotropical Culex Mosquitoes by MALDI-TOF MS Profiling
Source: MDPI journal article supplement (doi:10.3390/tropicalmed8030168), 2023-03-13
Supplement: s1 [file s1]

**Additional file S5.** Top-five mass peak list per mosquito species using thoraxes.

| MS peak number§ | m/z (Da)             | Average peak intensity (a.u.)* |                  |                   |                    |                        |                   |                    |                             |                        |                      |                     |
|-----------------|----------------------|--------------------------------|------------------|-------------------|--------------------|------------------------|-------------------|--------------------|-----------------------------|------------------------|----------------------|---------------------|
|                 |                      | <i>Cx. declarator</i>          | <i>Cx. dunni</i> | <i>Cx. eastor</i> | <i>Cx. idottus</i> | <i>Cx. nigripalpus</i> | <i>Cx. pedroi</i> | <i>Cx. portesi</i> | <i>Cx. quinquefasciatus</i> | <i>Cx. rabanicolus</i> | <i>Cx. spissipes</i> | <i>Cx. usquatus</i> |
| 1               | 3148.3               | 8.72                           | 2.86             | <b>18</b>         | <b>19.9</b>        | 8.66                   | 4.16              | 3                  | 13.74                       | <b>14.63</b>           | <b>18.9</b>          | 12.27               |
| 2               | 3196.38              | 2.33                           | 3.97             | 2.15              | 1.65               | 3                      | 2.71              | <b>15.75</b>       | 3.77                        | 2.31                   | 2.01                 | 2.38                |
| 3               | 4081.85              | 3.78                           | 9.38             | 6.8               | 11.28              | <b>20.72</b>           | 11.36             | 9.14               | <b>24.57</b>                | 10                     | 7.63                 | <b>18.51</b>        |
| 4               | 4307.06              | 4.7                            | 2.45             | 3.13              | 1.82               | 13.33                  | 11.71             | <b>16.98</b>       | 2.12                        | 1.76                   | 1.59                 | 16.15               |
| 5               | 4324.51              | <b>18.26</b>                   | 1.87             | 2.28              | 2.54               | 7.36                   | 4.01              | 5.59               | 19.77                       | 4.31                   | 2.2                  | 7.5                 |
| 6               | 4351.68              | 6.23                           | 14.31            | 14.71             | <b>17.19</b>       | 3.85                   | 4.44              | 4.3                | 5.7                         | 12.42                  | 13.92                | 4.68                |
| 7               | 5127.88              | 4.19                           | <b>17.67</b>     | 3.61              | 2.83               | <b>4.28</b>            | 4.21              | 2.18               | 8.94                        | 2.85                   | 2.72                 | 1.76                |
| 8               | 5206.16 <sup>#</sup> | <b>34.32</b>                   | 2.08             | 1.32              | 1.68               | <b>32.02</b>           | <b>14.22</b>      | 15.05              | <b>44.38</b>                | 2.19                   | 1.99                 | <b>36.63</b>        |
| 9               | 5335.07              | 3.98                           | 1.36             | 2.73              | 2.61               | 4.22                   | <b>15.1</b>       | 3.09               | 4.36                        | 3.19                   | 1.86                 | 3.58                |
| 10              | 5405.68 <sup>#</sup> | 1.27                           | <b>21.72</b>     | <b>31.97</b>      | <b>25.05</b>       | 1.38                   | 1.48              | <b>18.89</b>       | 1.5                         | <b>22.66</b>           | 2.28                 | 1.59                |
| 11              | 5450.25              | 1.2                            | 3.28             | 2.9               | 3.65               | 1.28                   | 2                 | 2.63               | 1.23                        | 3.35                   | <b>18.01</b>         | 1.35                |
| 12              | 6085.39              | 15.15                          | 2.68             | 17.39             | 14.94              | 12.87                  | 5.52              | 3.29               | <b>20.55</b>                | 12.6                   | 6.92                 | 14.79               |
| 13              | 6124.41              | 4.13                           | 12.1             | 3.96              | 4.06               | 3.76                   | <b>16.12</b>      | 10.48              | 5.69                        | 3.62                   | 14.62                | 4.59                |
| 14              | 6299.52              | 16.22                          | 5.9              | <b>31.93</b>      | <b>33.92</b>       | <b>15.31</b>           | 4.78              | 3.93               | <b>23.54</b>                | <b>25.93</b>           | <b>37.42</b>         | <b>21.75</b>        |
| 15              | 6357.55              | 2.6                            | <b>33.13</b>     | 3.27              | 3.82               | 2.57                   | 1.76              | 3.65               | 3.09                        | 3.63                   | 4.49                 | 2.98                |
| 16              | 6396.18              | 1.94                           | 4.79             | 2.25              | 1.81               | 1.76                   | 3.3               | <b>24.36</b>       | 2.24                        | 2.12                   | 2.96                 | 2.63                |
| 17              | 6426.43 <sup>#</sup> | 1.83                           | 3.87             | 4.1               | 1.74               | 1.38                   | <b>17.89</b>      | 6.28               | 4.66                        | 2.4                    | 2.05                 | 3.59                |
| 18              | 8056.24              | 5.28                           | 3.86             | 3.04              | 3                  | 2.08                   | 2.59              | 4.81               | 1.59                        | 2.24                   | <b>20.2</b>          | 2.37                |
| 19              | 8076.8               | <b>19.73</b>                   | 2.76             | 3.85              | 3.96               | 2.1                    | 2.22              | 10.32              | 2.07                        | 2.83                   | 6.03                 | 2.27                |
| 20              | 8163.7               | 5.1                            | 12.45            | 10.25             | 15.04              | <b>35.07</b>           | <b>17.35</b>      | 8.8                | <b>31.34</b>                | <b>14.09</b>           | 8.32                 | <b>25.88</b>        |
| 21              | 8204.74              | <b>20.82</b>                   | 4.45             | 2.92              | 3.57               | 5.47                   | 3.11              | 11.62              | 5.59                        | 3.57                   | 3.78                 | 4.83                |
| 22              | 8613.83              | 5.84                           | 1.55             | 2.03              | 1.75               | <b>17.8</b>            | 11.22             | <b>19.69</b>       | 4.07                        | 1.64                   | 1.37                 | <b>18.26</b>        |
| 23              | 8646.95              | <b>23.55</b>                   | 2.19             | 2.28              | 3.04               | 8.02                   | 4.06              | 5.96               | 20.49                       | 5.24                   | 3.87                 | 7.13                |
| 24              | 8703.28              | 6.58                           | <b>20.43</b>     | <b>19.7</b>       | <b>21.16</b>       | 4.16                   | 2.69              | 4.19               | 5.73                        | <b>16.01</b>           | <b>21.94</b>         | 4.32                |
| 25              | 8945.17              | 12.43                          | 3                | <b>19.02</b>      | 16.5               | 11.96                  | 8.31              | 7.25               | 10.85                       | 13.15                  | 2.5                  | 5.46                |
| 26              | 9016.11              | 3.2                            | <b>17.47</b>     | 5.59              | 4.22               | 6.07                   | 4.23              | 14.69              | 4.95                        | 3.9                    | 17.34                | 3.05                |

§List of MS peaks used to distinct *Culex* species based on the Genetic Algorithm model analysis of ClinProTools. \*The top-five mass peaks per *Culex* species are indicated in bold. #MS peaks for which mass-to-charge ratio ( $m/z$ ) were similar with legs top-five MS peak list (see Additional file S3). Da: Daltons;  $m/z$ : mass to charge; a.u.: arbitrary unit.
