# Supplementary material for: Identification of Neotropical Culex Mosquitoes by MALDI-TOF MS Profiling
Source: MDPI journal article supplement (doi:10.3390/tropicalmed8030168), 2023-03-13
Supplement: s1 [file s1]

**Additional file S4.** Top-five mass peak list per mosquito species using legs.

| MS peak number§ | m/z (Da)             | Average peak intensity (a.u.)* |                  |                   |                    |                        |                   |                    |                             |                        |                      |                     |
|-----------------|----------------------|--------------------------------|------------------|-------------------|--------------------|------------------------|-------------------|--------------------|-----------------------------|------------------------|----------------------|---------------------|
|                 |                      | <i>Cx. declarator</i>          | <i>Cx. dunni</i> | <i>Cx. eastor</i> | <i>Cx. idottus</i> | <i>Cx. nigripalpus</i> | <i>Cx. pedroi</i> | <i>Cx. portesi</i> | <i>Cx. quinquefasciatus</i> | <i>Cx. rabanicolus</i> | <i>Cx. spissipes</i> | <i>Cx. usquatus</i> |
| 1               | 2952.56              | 3.28                           | <b>9.56</b>      | 8.07              | 5.35               | 4.54                   | 7.61              | 5.13               | 2.55                        | 9.58                   | 3.54                 | 2.35                |
| 2               | 3108.38              | <b>9.41</b>                    | <b>10.95</b>     | <b>12.12</b>      | <b>7.56</b>        | 7.31                   | <b>9.63</b>       | <b>10.94</b>       | 4.51                        | 8.82                   | <b>10.24</b>         | 4.23                |
| 3               | 3125.26              | 4.48                           | <b>9.35</b>      | 6.14              | 6.45               | 4.89                   | <b>13.4</b>       | 5.49               | 4.7                         | <b>12.39</b>           | 6.72                 | 3.38                |
| 4               | 3136.01              | 6.4                            | 5.43             | 5.93              | 7.16               | <b>18.87</b>           | 5.62              | 4.97               | 2.65                        | 7.37                   | 4.75                 | 7.36                |
| 5               | 3443.81              | 6.09                           | 8.27             | 7.58              | 5.32               | 11.06                  | <b>14.45</b>      | 6.87               | 2.87                        | 8.62                   | 3.55                 | 2.77                |
| 6               | 4073.42              | 3.47                           | 7.8              | 10.18             | <b>9.47</b>        | 4.52                   | 3.56              | 3.11               | 3.31                        | 5.47                   | 5.6                  | 2.66                |
| 7               | 4099.27              | 4.21                           | 5.36             | 4.64              | 4.12               | 9.42                   | 5.74              | 3.91               | <b>12.16</b>                | 5.9                    | 2.44                 | 3.68                |
| 8               | 4283.69              | 8.89                           | 8.95             | <b>10.63</b>      | <b>7.28</b>        | 8.47                   | 7.32              | 5.69               | 8.04                        | 5.75                   | 5.19                 | <b>12.81</b>        |
| 9               | 4532.03              | 4.98                           | 8.1              | <b>12.9</b>       | <b>10.5</b>        | 5.66                   | 3.07              | 3.76               | 5.64                        | <b>11.9</b>            | 5.12                 | 5.38                |
| 10              | 4563.79              | 3.56                           | <b>29.32</b>     | <b>17.56</b>      | 2.76               | 5.65                   | <b>10.57</b>      | 4.91               | 3.29                        | <b>14.82</b>           | 5.08                 | 3.72                |
| 11              | 4590.63              | 3.29                           | 5.77             | 4.41              | 2.26               | 2.45                   | 6.1               | <b>31.4</b>        | 1.76                        | 5.35                   | <b>15.83</b>         | 2.41                |
| 12              | 4606.79              | 2.65                           | 4.22             | 4                 | 2.4                | 1.66                   | <b>31.48</b>      | 8.17               | 1.49                        | 2.31                   | 5.21                 | 1.61                |
| 13              | 4686.19              | <b>16.14</b>                   | 1.97             | 1.87              | 2.24               | <b>16.86</b>           | 1.79              | 1.68               | <b>34.52</b>                | 1.61                   | 2.01                 | 2.64                |
| 14              | 4695                 | <b>17.73</b>                   | 2.52             | 2.16              | 2.45               | <b>25.77</b>           | 1.42              | 1.93               | <b>8.32</b>                 | 1.88                   | 1.63                 | 2.94                |
| 15              | 4721.48              | <b>30.21</b>                   | 2.8              | 2.55              | 4.24               | <b>17.64</b>           | 2.12              | 1.83               | 5.13                        | 3                      | 2.22                 | <b>10.36</b>        |
| 16              | 4819.94              | 5.24                           | <b>14.05</b>     | <b>10.78</b>      | 2.33               | 5.06                   | 4.76              | 6.17               | <b>10.43</b>                | 2.65                   | 2.06                 | 7.43                |
| 17              | 4933.81              | 5.23                           | 4.22             | 5.21              | 2.09               | 3.96                   | 3.94              | 4.19               | 1.8                         | 2.67                   | <b>17.72</b>         | 3.87                |
| 18              | 4974.12              | 1.85                           | 1.87             | 2.09              | <b>11.15</b>       | 3.34                   | 1.62              | 1.69               | 4.06                        | <b>15.83</b>           | 2.14                 | 6.51                |
| 19              | 5206.88 <sup>#</sup> | <b>12.73</b>                   | 2.15             | 3.09              | 2.15               | <b>14</b>              | 3.42              | 7.35               | 7.33                        | 3.95                   | 2.25                 | 4.97                |
| 20              | 5405.69 <sup>#</sup> | 2.16                           | 8.2              | 9.42              | 6.26               | 1.8                    | 1.59              | <b>9.17</b>        | 1.28                        | 6.16                   | 1.56                 | 4.35                |
| 21              | 5495.25              | 3.32                           | 4.92             | 5.88              | 3.55               | 2.62                   | 5.86              | <b>11.26</b>       | 3.3                         | 4.89                   | 6.45                 | 3.12                |
| 22              | 5616.4               | 2.28                           | 1.46             | 1.44              | 2.42               | 1.28                   | 1.95              | <b>14.95</b>       | 2.47                        | 2.11                   | 2.24                 | 1.53                |
| 23              | 6427.33 <sup>#</sup> | 3.13                           | 1.53             | 1.64              | 1.39               | 1.7                    | 4.74              | 2.76               | <b>12.08</b>                | 1.1                    | 0.83                 | 2.35                |
| 24              | 6811.21              | 7.1                            | 1.13             | 1.19              | 1.09               | 6.52                   | 3.92              | 3.66               | 6.01                        | 0.8                    | 1.02                 | <b>9.51</b>         |
| 25              | 7447.78              | 5.27                           | 1.5              | 0.96              | 1.45               | 7.02                   | 0.92              | 1.15               | 7.7                         | 1.15                   | 1.56                 | <b>19.05</b>        |
| 26              | 7856.69              | 4.96                           | 5.73             | 6.41              | 2.9                | 4.78                   | 6.33              | 5.05               | 5.58                        | 4.78                   | <b>10.19</b>         | 2.63                |
| 27              | 8232.11              | 5.33                           | 1.39             | 1.31              | 0.92               | 1.53                   | 0.77              | 1.52               | 7.38                        | 0.66                   | 2.07                 | <b>8.78</b>         |

|    |         |      |      |      |      |      |      |      |      |             |             |      |
|----|---------|------|------|------|------|------|------|------|------|-------------|-------------|------|
| 28 | 8658.23 | 2.95 | 0.91 | 0.99 | 1.86 | 1.73 | 0.87 | 1.43 | 3.57 | <b>10.6</b> | 1.2         | 1.26 |
| 29 | 8801.36 | 0.62 | 0.67 | 0.69 | 1.1  | 0.5  | 0.58 | 1.48 | 0.68 | 1.65        | <b>8.73</b> | 0.69 |

§List of MS peaks used to distinct *Culex* species based on the Genetic Algorithm model analysis of ClinProTools. \*The top-five mass peaks per *Culex* species are indicated in bold. #MS peaks for which mass-to-charge ratio (m/z) were similar with thorax top-five MS peak list (see Additional file S4). Da: Daltons; m/z: mass to charge; a.u.: arbitrary unit.
