# Supplementary material for: Identification of Neotropical Culex Mosquitoes by MALDI-TOF MS Profiling
Source: Trop Med Infect Dis. 2023 Mar 13;8(3):168. doi: 10.3390/tropicalmed8030168 (PMC10055718; doi:10.3390/tropicalmed8030168)
Supplement: Supplementary file 1 [file tropicalmed-08-00168-s001.zip]

Archive with 7 entries (7 files):
- Additional file_S1_MSDB.zip
- Additional_file S2.pptx
- Additional_file S3.pptx
- Additional_file S4.pdf
- Additional_file S5.pdf
- Additional_file S6.pptx
- Additional_files_legend_Costa_et_al.pdf
